# Supplementary material for: The Impact of Rainfall Variability on Diets and Undernutrition of Young Children in Rural Burkina Faso
Source: PubMed Central journal article supplement (PMC8489680; doi:10.3389/fpubh.2021.693281), 2021-09-20
Supplement: Data_Sheet_1.pdf [file Data_Sheet_1.pdf]

*Supplementary Material*

**Supplementary Table S1: 15 rainfall indicators by stratum in the Nouna HDSS area from 1981 to 2019**

| Indicator     |                                                   |                                                              | Cissé     |            |                    | Kodougou  |            |                    | Nouna     |            |                    | Sono      |            |                    | Toni      |            |                    | Diff. in means |
|---------------|---------------------------------------------------|--------------------------------------------------------------|-----------|------------|--------------------|-----------|------------|--------------------|-----------|------------|--------------------|-----------|------------|--------------------|-----------|------------|--------------------|----------------|
| ID (unit)     | Indicator name                                    | Definitions                                                  | Mean ± SD | Min-Max    | Trend <sup>a</sup> | Mean ± SD | Min-Max    | Trend <sup>a</sup> | Mean ± SD | Min-Max    | Trend <sup>a</sup> | Mean ± SD | Min-Max    | Trend <sup>a</sup> | Mean ± SD | Min-Max    | Trend <sup>a</sup> | p-value        |
| PRCPTOT (mm)  | Annual total precipitation                        | Annual total PRCP in wet days (RR>=1mm)                      | 724 ± 166 | 355 - 1087 | ↑*                 | 778 ± 153 | 430 - 1113 | ↑**                | 730 ± 127 | 540 - 1019 | ↑*                 | 730 ± 135 | 486 - 1062 | ↑*                 | 744 ± 139 | 504 - 1115 | ↑**                | 0.477          |
| R95p (days)   | Very wet days                                     | Annual number of days with RR>95th percentile                | 5 ± 1     | 0 - 6      | ↑*                 | 4 ± 2     | 0 - 6      | ↗                  | 5 ± 1     | 0 - 6      | ↑                  | 4 ± 2     | 0 - 6      | ↑                  | 4 ± 2     | 0 - 6      | ↑                  | 0.1091         |
| CDD (days)    | Consecutive dry days                              | Max. no. of consecutive days with RR<1mm                     | 171 ± 34  | 64 - 222   | ↑*                 | 164 ± 37  | 81 - 238   | ↗                  | 161 ± 33  | 97 - 238   | ↑*                 | 164 ± 31  | 80 - 236   | ↗                  | 161 ± 34  | 63 - 211   | ↗                  | 0.715          |
| R99p (days)   | Extremely wet days                                | Annual number of days with RR>99th percentile                | 2 ± 2     | 0 - 6      | ↑                  | 1 ± 2     | 0 - 5      | →                  | 1 ± 2     | 0 - 5      | ↗                  | 4 ± 2     | 0 - 6      | ↑                  | 2 ± 2     | 0 - 5      | ↗                  | <b>0.000**</b> |
| R20Aug (days) | Days with very heavy rains in Aug                 | Count of days when PRCP>=20mm                                | 5 ± 2     | 0 - 9      | ↗*                 | 5 ± 2     | 0 - 9      | ↗*                 | 4 ± 2     | 1 - 8      | ↗**                | 5 ± 2     | 0 - 9      | ↗                  | 5 ± 2     | 2 - 8      | ↗*                 | 0.787          |
| PRCPAUG (mm)  | Total precipitation in Aug                        | Cumulative rainfall in August (RR>=1mm)                      | 243 ± 106 | 57 - 561   | ↗*                 | 227 ± 68  | 150 - 480  | ↗**                | 224 ± 76  | 87 - 379   | ↗**                | 231 ± 82  | 78 - 378   | ↗                  | 230 ± 75  | 124 - 397  | ↗**                | 0.869          |
| PRCPJUL (mm)  | Total precipitation in July                       | Cumulative rainfall in July (RR>=1mm)                        | 181 ± 66  | 63 - 300   | ↗*                 | 196 ± 63  | 85 - 359   | →                  | 183 ± 51  | 64 - 298   | →                  | 182 ± 59  | 70 - 367   | →                  | 193 ± 67  | 32 - 316   | ↗**                | 0.737          |
| R20Jul (days) | Days with very heavy rains in July                | Count of days when PRCP>=20mm                                | 4 ± 2     | 1 - 8      | ↗                  | 4 ± 2     | 1 - 8      | →                  | 4 ± 2     | 1 - 7      | →                  | 3 ± 2     | 1 - 9      | →                  | 4 ± 2     | 0 - 8      | ↗*                 | 0.793          |
| R10 (days)    | Days with heavy precipitation                     | Annual count of days when PRCP>=10mm                         | 25 ± 5    | 15 - 37    | ↗*                 | 27 ± 5    | 18 - 39    | ↗**                | 25 ± 4    | 17 - 33    | ↗                  | 25 ± 4    | 19 - 32    | →**                | 25 ± 4    | 18 - 38    | →*                 | 0.360          |
| SDII (mm/day) | Simple daily intensity index                      | Annual total precipitation by no. of wet days (PRCP>=1mm)    | 15 ± 3    | 9 - 22     | ↗**                | 15 ± 2    | 12 - 20    | →                  | 15 ± 2    | 11 - 20    | →                  | 15 ± 2    | 9 - 20     | →                  | 15 ± 2    | 12 - 19    | →*                 | 0.717          |
| R20 (days)    | Days with very heavy precipitation                | Annual count of days when PRCP>=20mm                         | 13 ± 4    | 3 - 21     | ↗                  | 14 ± 3    | 6 - 21     | →*                 | 13 ± 3    | 7 - 20     | →                  | 13 ± 4    | 4 - 23     | →                  | 13 ± 3    | 8 - 19     | →*                 | 0.437          |
| R25 (days)    | Days with very heavy precipitation                | Annual count of days when PRCP>=25mm                         | 9 ± 4     | 1 - 17     | ↗*                 | 10 ± 3    | 3 - 17     | →                  | 9 ± 3     | 3 - 15     | →                  | 9 ± 3     | 1 - 16     | →                  | 10 ± 3    | 5 - 18     | →**                | 0.325          |
| CWD (days)    | Consecutive wet days                              | Max. no. of consecutive days with RR>=1mm                    | 4 ± 1     | 2 - 9      | →                  | 4 ± 2     | 3 - 8      | →                  | 3 ± 1     | 2 - 6      | →                  | 4 ± 1     | 3 - 6      | →                  | 4 ± 1     | 2 - 8      | →                  | <b>0.015*</b>  |
| Lws (days)    | Duration wet season                               | Length of the wet season                                     | 132 ± 23  | 88 - 177   | →                  | 142 ± 21  | 94 - 179   | →                  | 136 ± 23  | 77 - 179   | →                  | 138 ± 24  | 85 - 182   | →                  | 135 ± 23  | 77 - 177   | →                  | 0.359          |
| CDDws (days)  | Consecutive dry days in wet season (mini-drought) | Max. no. of consecutive dry days (RR<1 mm) during wet season | 10 ± 3    | 3 - 17     | →                  | 11 ± 2    | 7 - 15     | →                  | 9 ± 3     | 4 - 15     | ↘                  | 11 ± 3    | 5 - 17     | →                  | 10 ± 3    | 5 - 17     | ↘*                 | 0.182          |

<sup>a</sup>Slope = steep increase (↑), when > 1.0; light increase (↗), when < 1.00 and > 0.10; no change (→), when > -0.10 and < 0.10; light decrease (↘), when < -0.10; \* p-value < 0.05, \*\* p-value < 0.01

**Supplementary table S2: Means (SDs) and z-scores of the rainfall indicators**

| <b>ID (unit)</b> | <b>Indicator name</b>                             | <b>Mean (SD)</b> | <b>Z-score</b> |
|------------------|---------------------------------------------------|------------------|----------------|
| PRCPTOT (mm)     | Annual total precipitation                        | 852 (150)        | 0.79           |
| SDII (mm/day)    | Simple daily intensity index                      | 17 (2)           | 0.66           |
| R10 (days)       | Days with heavy precipitation                     | 28 (5)           | 0.70           |
| R20 (days)       | Days with very heavy precipitation                | 15 (3)           | 0.48           |
| R25 (days)       | Days with very heavy precipitation                | 12 (3)           | 0.68           |
| CDD (days)       | Consecutive dry days                              | 162 (41)         | -0.02          |
| CWD (days)       | Consecutive wet days                              | 4 (1)            | 0.16           |
| R95p (mm)        | Very wet days                                     | 5 (1)            | 0.43           |
| R99p (mm)        | Extremely wet days                                | 3 (2)            | 0.52           |
| Lws (days)       | Duration wet season                               | 128 (14)         | -0.33          |
| CDDws (days)     | Consecutive dry days in wet season (mini-drought) | 10 (3)           | -0.14          |
| R20Jul (days)    | Days with "big rains" in July                     | 4 (1)            | 0.31           |
| R20Aug (days)    | Days with "big rains" in August                   | 6 (2)            | 0.61           |
| PRCPJUL (mm)     | Total precipitation in July                       | 227 (49)         | 0.59           |
| PRCPAUG (mm)     | Total precipitation in August                     | 300 (82)         | 0.90           |

**Supplementary table S3: Associations of the three DPSs with HAZ of 1,439 children and WHZ of 1,434 children aged 7-60 months**

|                                       | Tertile 1 | Tertile 2      |             | Tertile 3      |             | Per 1 score-point increase |             |               |
|---------------------------------------|-----------|----------------|-------------|----------------|-------------|----------------------------|-------------|---------------|
|                                       |           | $\beta$ -coef. | 95% CI      | $\beta$ -coef. | 95% CI      | $\beta$ -coef.             | 95% CI      | p-value trend |
| <b>Height-for-Age zscore (HAZ)</b>    |           |                |             |                |             |                            |             |               |
| <b>DPS1: Market-based diet</b>        |           |                |             |                |             |                            |             |               |
| Unadjusted model                      | Ref.      | -0.02          | -0.20, 0.15 | 0.07           | -0.10, 0.24 | 0.01                       | 0.00, 0.02  | 0.222         |
| Adj. model 1a                         | Ref.      | 0.07           | -0.11, 0.23 | 0.19           | 0.02, 0.36  | 0.02                       | 0.00, 0.03  | <b>0.010*</b> |
| Adj. model 2b                         | Ref.      | 0.03           | -0.13, 0.20 | 0.19           | 0.02, 0.35  | 0.02                       | 0.00, 0.03  | <b>0.012*</b> |
| <b>DPS2: Legume-based diet</b>        |           |                |             |                |             |                            |             |               |
| Unadjusted model                      | Ref.      | -0.02          | -0.19, 0.16 | -0.13          | -0.29, 0.03 | -0.01                      | -0.02, 0.00 | 0.115         |
| Adj. model 1a                         | Ref.      | 0.12           | -0.05, 0.30 | 0.06           | -0.10, 0.23 | 0.00                       | -0.01, 0.01 | 0.383         |
| Adj. model 2b                         | Ref.      | 0.19           | 0.01, 0.37  | 0.17           | 0.00, 0.34  | 0.01                       | 0.00, 0.02  | <b>0.045*</b> |
| <b>DPS3: Vegetable-based diet</b>     |           |                |             |                |             |                            |             |               |
| Unadjusted model                      | Ref.      | -0.03          | -0.20, 0.14 | 0.04           | -0.14, 0.21 | 0.00                       | -0.01, 0.01 | 0.991         |
| Adj. model 1a                         | Ref.      | 0.03           | -0.14, 0.20 | 0.09           | -0.08, 0.26 | 0.01                       | -0.01, 0.02 | 0.353         |
| Adj. model 2b                         | Ref.      | -0.07          | -0.23, 0.10 | 0.00           | -0.18, 0.17 | 0.00                       | -0.01, 0.01 | 0.818         |
| <b>Weight-for-Height zscore (WHZ)</b> |           |                |             |                |             |                            |             |               |
| <b>DPS1: Market-based diet</b>        |           |                |             |                |             |                            |             |               |
| Unadjusted model                      | Ref.      | 0.03           | -0.10, 0.16 | 0.00           | -0.13, 0.13 | 0.00                       | -0.01, 0.01 | 0.444         |
| Adj. model 1a                         | Ref.      | -0.02          | -0.15, 0.11 | -0.06          | -0.19, 0.07 | 0.00                       | -0.01, 0.01 | 0.995         |
| Adj. model 2b                         | Ref.      | -0.04          | -0.17, 0.09 | -0.09          | -0.23, 0.04 | 0.00                       | -0.01, 0.01 | 0.573         |
| <b>DPS2: Legume-based diet</b>        |           |                |             |                |             |                            |             |               |
| Unadjusted model                      | Ref.      | 0.06           | -0.07, 0.19 | 0.05           | -0.08, 0.18 | 0.01                       | 0.00, 0.01  | 0.084         |
| Adj. model 1a                         | Ref.      | -0.04          | -0.17, 0.09 | -0.07          | -0.20, 0.07 | 0.00                       | -0.01, 0.01 | 0.754         |
| Adj. model 2b                         | Ref.      | -0.04          | -0.18, 0.10 | -0.04          | -0.19, 0.10 | 0.00                       | -0.01, 0.01 | 0.936         |
| <b>DPS3: Vegetable-based diet</b>     |           |                |             |                |             |                            |             |               |
| Unadjusted model                      | Ref.      | 0.06           | -0.07, 0.19 | 0.08           | -0.05, 0.22 | 0.01                       | 0.00, 0.02  | <b>0.047*</b> |
| Adj. model 1a                         | Ref.      | -0.01          | -0.14, 0.12 | 0.05           | -0.09, 0.18 | 0.01                       | 0.00, 0.02  | 0.166         |
| Adj. model 2b                         | Ref.      | -0.04          | -0.17, 0.09 | 0.03           | -0.11, 0.16 | 0.00                       | -0.01, 0.01 | 0.435         |

a Adjusted for child's age and sex, and stratum; b Adjusted for all variables included in adj. model 1 and mother's and household head's education and ethnicity, household wealth,

siblings aged <5 years, child's fever and diarrhea the previous two weeks, and breastfeeding status, and year of data collection; \* p-value < 0.05

**Supplementary table S4: RRR-derived explained variation and rotated factor loadings of rainfall indicators with the three DPSs**

| Extracted factors             |                                         |                                                                 | Explained variation (%) | Factor loadings | Factor weights |
|-------------------------------|-----------------------------------------|-----------------------------------------------------------------|-------------------------|-----------------|----------------|
| <i>Predictor variables</i>    |                                         |                                                                 |                         |                 |                |
| CDDws                         | Mini-droughts                           | Max. number of consecutive dry days (RR<1 mm) during wet season | 49.06                   | <b>0.41</b>     | 0.80           |
| PRCPJUL                       | Dry spell July                          | Monthly total PRCP in wet days (RR>=1mm)                        | 29.96                   | <b>0.32</b>     | 0.81           |
| R99p                          | Extremely wet days                      | Annual total PRCP when RR>99th percentile                       | 30.42                   | <b>0.32</b>     | -0.27          |
| R20Jul                        | Number of "big rains" in July           | Count of days when PRCP>=20mm                                   | 4.57                    | 0.12            | -0.49          |
| Lws                           | Duration wet season                     | Length of the wet season                                        | 2.59                    | 0.09            | -0.34          |
| R95p                          | Very wet days                           | Annual total PRCP when RR>95th percentile                       | 0.00                    | 0.00            | -0.27          |
| SDII                          | Simple daily intensity index            | Annual total precipitation by number of wet days (PRCP>=10mm)   | 7.89                    | -0.16           | -0.41          |
| R20                           | Number of very heavy precipitation days | Annual count of days when PRCP>=20mm                            | 11.64                   | -0.20           | 0.18           |
| R25                           | Number of very heavy precipitation days | Annual count of days when PRCP>=25mm                            | 11.23                   | -0.19           | 0.84           |
| CWD                           | Consecutive wet days                    | Maximum number of consecutive days with RR>=1mm                 | 15.24                   | -0.23           | 0.07           |
| PRCPTOT                       | Annual total wet-day precipitation      | Annual total PRCP in wet days (RR>=1mm)                         | 15.66                   | -0.23           | -0.41          |
| CDD                           | Consecutive dry days                    | Maximum number of consecutive days with RR<1mm                  | 19.77                   | <b>-0.26</b>    | -0.31          |
| R20Aug                        | Number of "big rains" in August         | Count of days when PRCP>=20mm                                   | 29.48                   | <b>-0.32</b>    | 0.14           |
| R10                           | Number of heavy precipitation days      | Annual count of days when PRCP>=10mm                            | 32.63                   | <b>-0.33</b>    | 0.11           |
| PRCPAUG                       | Dry spell August                        | Monthly total PRCP in wet days (RR>=1mm)                        | 36.48                   | <b>-0.35</b>    | 0.00           |
| <b>Explained variance (%)</b> |                                         |                                                                 | <b>19.77</b>            |                 |                |
| <i>Response variables</i>     |                                         |                                                                 |                         |                 |                |
| DP 1                          | Market-based diet                       |                                                                 | 10.11                   |                 | 0.49           |
| DP 2                          | Legume-based diet                       |                                                                 | 7.71                    |                 | 0.41           |
| DP 3                          | Vegetable-based diet                    |                                                                 | 24.51                   |                 | 0.77           |
| <b>Explained variance (%)</b> |                                         |                                                                 | <b>14.11</b>            |                 |                |

\* Precipitation indicators with factor loadings of  $\geq |0.20|$  indicate relevant contributions to the precipitation pattern score

**Supplementary table S5: Pearson correlation coefficients (N=1,364) for precipitation indicators (predictor variables), the RRR-derived precipitation pattern score (PVS), and dietary pattern scores (response variables)**

| Predictor variables |                                     | PVS          |                         | Market-based diet (DP 1) |                         | Legume-based diet (DP 2) |                         | Vegetable-based diet (DP 3) |                         |
|---------------------|-------------------------------------|--------------|-------------------------|--------------------------|-------------------------|--------------------------|-------------------------|-----------------------------|-------------------------|
|                     |                                     | Unadj. model | Adj. model <sup>a</sup> | Unadj. model             | Adj. model <sup>a</sup> | Unadj. model             | Adj. model <sup>a</sup> | Unadj. model                | Adj. model <sup>a</sup> |
| CDDws (days)        | Consecutive dry days in wet season  | 0.70***      | 0.71***                 | 0.20***                  | 0.21***                 | 0.12***                  | 0.14***                 | 0.40***                     | 0.41***                 |
| R10 (days)          | Days with heavy precipitation       | -0.57***     | -0.59***                | -0.10***                 | -0.12***                | -0.07*                   | -0.10***                | -0.39***                    | -0.40***                |
| CDD (days)          | Consecutive dry days                | -0.44***     | -0.58***                | -0.11***                 | -0.19***                | -0.12**                  | -0.16***                | -0.26***                    | -0.26***                |
| PRCPAUG (mm)        | Cumulative rainfall in August       | -0.60***     | -0.58***                | -0.21***                 | -0.17***                | -0.12***                 | -0.12***                | -0.31***                    | -0.34***                |
| R99p (mm)           | Extremely wet days                  | 0.55***      | 0.55***                 | 0.19***                  | 0.19***                 | 0                        | 0.01                    | 0.35***                     | 0.35***                 |
| R20Aug (days)       | Days with "big rains" in August     | -0.54***     | -0.53***                | -0.18***                 | -0.17***                | -0.04                    | -0.05*                  | -0.33***                    | -0.34***                |
| CDD (days)          | Consecutive dry days                | -0.40***     | -0.52***                | 0.01                     | -0.07**                 | -0.07*                   | -0.13***                | -0.31***                    | -0.34***                |
| PRCPJUL (mm)        | Total wet-day precipitation in July | 0.55***      | 0.52***                 | 0.18***                  | 0.13***                 | 0.06*                    | 0.05                    | 0.32***                     | 0.35***                 |
| CWD (days)          | Consecutive wet days                | -0.39***     | -0.40***                | -0.06*                   | -0.07**                 | -0.05                    | -0.06*                  | -0.27***                    | -0.27***                |
| PRCPTOT (mm)        | Annual total wet-day precipitation  | -0.40***     | -0.37***                | -0.09***                 | -0.07*                  | -0.11***                 | -0.12***                | -0.22***                    | -0.23***                |
| R20 (days)          | Days with very heavy precipitation  | -0.34***     | -0.36***                | -0.02                    | -0.05                   | -0.05                    | -0.09**                 | -0.25***                    | -0.26***                |
| R25 (days)          | Days with very heavy precipitation  | -0.34***     | -0.33***                | -0.06*                   | -0.05*                  | -0.11***                 | -0.13***                | -0.18***                    | -0.19***                |
| SDII (mm/day)       | Simple daily intensity index        | -0.28***     | -0.32***                | -0.07**                  | -0.10***                | -0.19***                 | -0.22***                | -0.09**                     | -0.09**                 |
| R20Jul (days)       | Days with "big rains" in July       | 0.21***      | 0.18***                 | 0.11***                  | 0.08**                  | 0.06*                    | 0.04                    | 0.08**                      | 0.08**                  |
| Lws (days)          | Duration wet season                 | 0.16***      | 0.16***                 | 0.08**                   | 0.08**                  | 0.01                     | 0.01                    | 0.08**                      | 0.08**                  |
| R95p (mm)           | Very wet days                       | 0            | 0.09***                 | -0.07**                  | 0.02                    | -0.05                    | 0.01                    | 0.07**                      | 0.07**                  |
| <b>Total</b>        |                                     |              |                         | <b>0.32***</b>           | <b>0.29***</b>          | <b>0.28***</b>           | <b>0.28***</b>          | <b>0.50***</b>              | <b>0.51***</b>          |

<sup>a</sup> Adjusted for child's age and sex, and stratum; Note: Correlations are considered weak 0 to 0.30, moderate 0.31 to 0.50, and strong 0.51 to 1.00

\* p-value < 0.05; \*\* p-value < 0.01; \*\*\* p-value < 0.001
